# Supplementary material
Source: MDPI journal article supplement (https://www.mdpi.com/2073-4433/11/2/161)
Supplement: s1 [file s1]

## Supplementary Materials:

# Carbonaceous Aerosols in Contrasting Atmospheric Environments in Greek Cities: Evaluation of the EC-tracer Methods for Secondary Organic Carbon Estimation

Dimitris G. Kaskaoutis <sup>1</sup>, Georgios Grivas <sup>1</sup>, Christina Theodosi <sup>1</sup>, Maria Tsagkaraki <sup>2</sup>, Despina Paraskevopoulou <sup>1</sup>, Iasonas Stavroulas <sup>1</sup>, Eleni Liakakou <sup>1</sup>, Antonis Gkikas <sup>3</sup>, Nikolaos Hatzianastassiou <sup>4</sup>, Cheng Wu <sup>5,6</sup>, Evangelos Gerasopoulos <sup>1</sup> and Nikolaos Mihalopoulos <sup>1,2,\*</sup>

**Table 1.** Measurement periods and number of samples at each site in the current study.

| Site/Campaign   | Period              | # samples                              |
|-----------------|---------------------|----------------------------------------|
| Thissio, Athens | 1/11/2013–2/19/2013 | 60 (PM <sub>2.5</sub> )<br>(day/night) |
| Ioannina        | 1/12/2013–2/14/2013 | 61 (TSP)<br>(day/night)                |
| Ioannina        | 3/3/2013–10/25/2013 | 20 (TSP)<br>(daily)                    |
| Ioannina        | 12/9/2013–2/12/2014 | 51 (TSP)<br>(day/night)                |
| Heraklion       | 1/10/2013–2/7/2013  | 55 (TSP)<br>(day/night)                |

**Table 2.** Pearson correlation coefficients (*r*) from the linear regressions of TSP, OC and EC concentrations with meteorological variables in Ioannina.

|     | Temp. | Temp. <sub>min</sub> | Wind Speed | Rainfall | Rainfall (>0.2 mm) |
|-----|-------|----------------------|------------|----------|--------------------|
| TSP | −0.29 | −0.63                | −0.30      | −0.44    | −0.57              |
| OC  | −0.59 | −0.66                | −0.54      | −0.35    | −0.40              |
| EC  | −0.39 | −0.58                | −0.35      | −0.31    | −0.42              |

**Table 3.** Pearson correlation coefficient (r) matrix between carbonaceous aerosols and ionic species in Ioannina. Values in boldface correspond to statistically significant correlations at the 95% confidence level. .

[illegible]

**Table 4.** Same as in Suppl. Table 3, but for Heraklion.

[illegible]

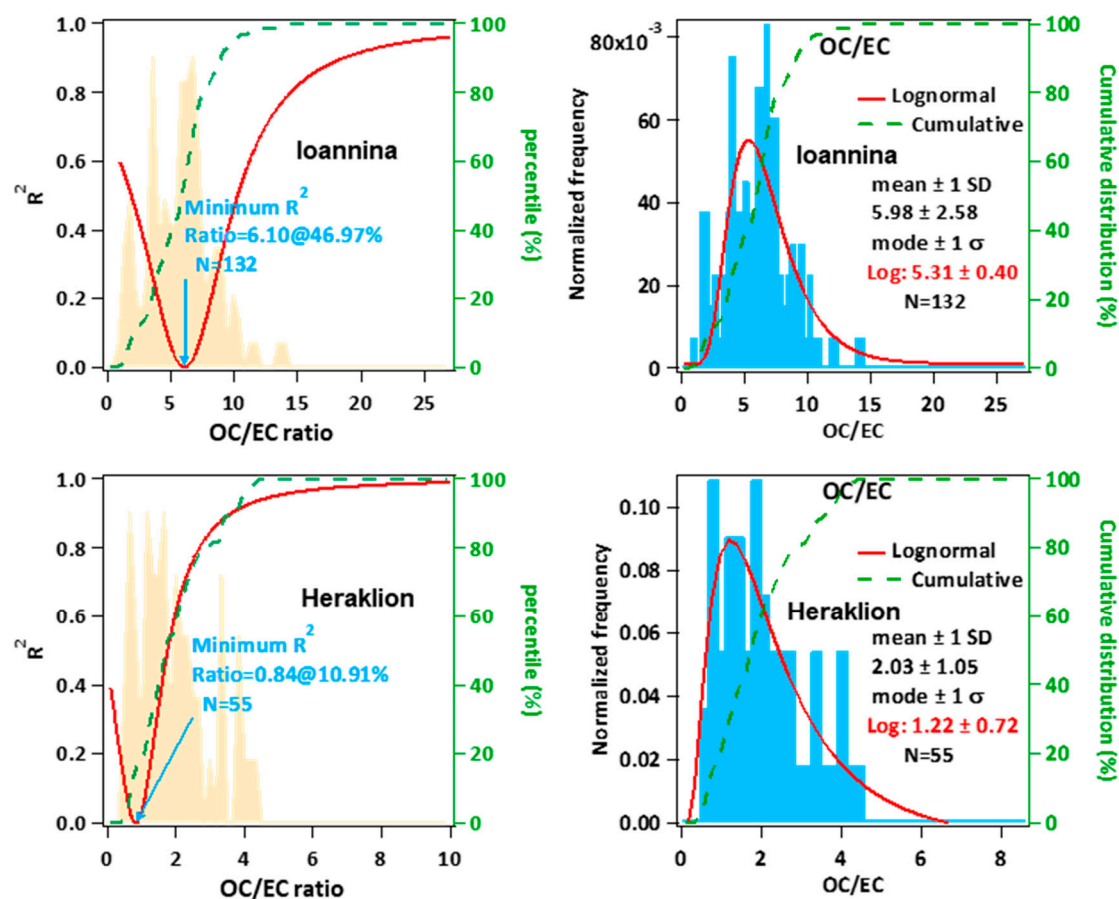

**Figure 1.** Application of the MRS method for Ioannina and Heraklion. At Ioannina,  $(OC/EC)_{pri}=6.10$ ; @46.97% means that ~53% of data would have positive SOC, while in Heraklion 89% of the data have positive SOC values. Lognormal curves are fitted in the OC/EC frequency distributions.

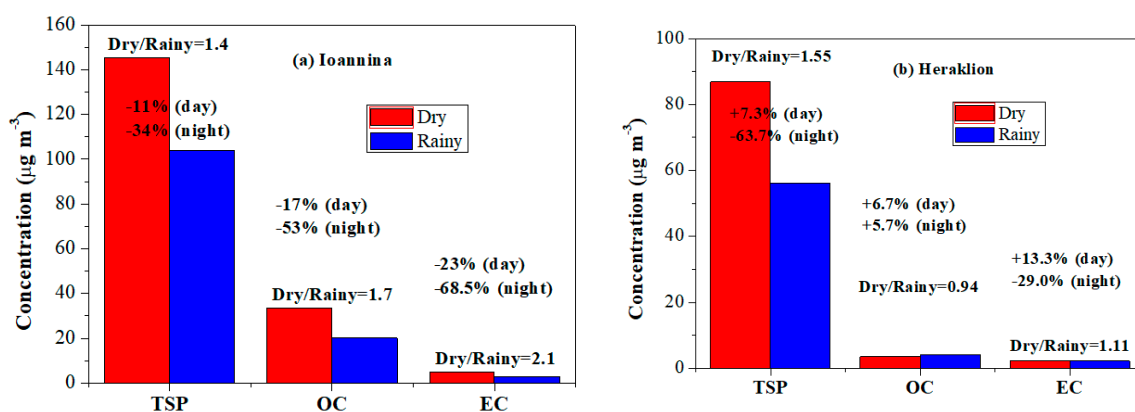

**Figure 2.** TSP, OC, EC concentrations and their ratios during dry and rainy days in Ioannina (a) and Heraklion (b). The percentage changes due to rainfall are also given for day and night samples.

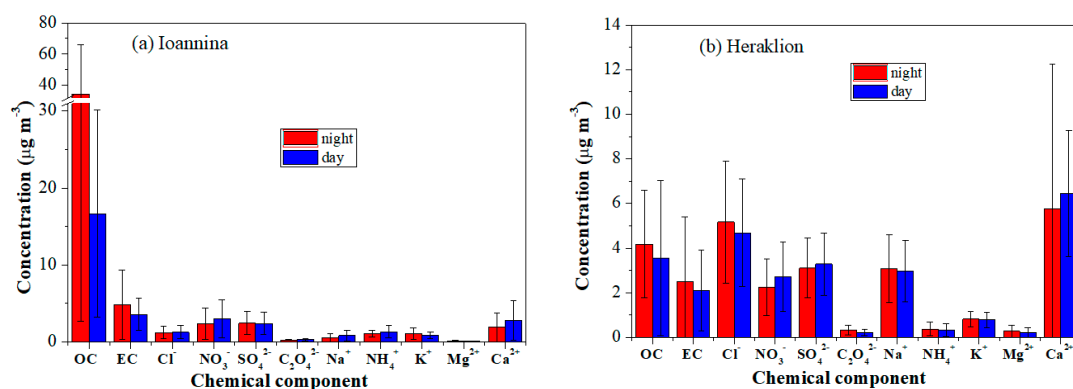

**Figure 3.** Day vs night concentrations of the carbonaceous-aerosol and inorganic species (in TSP) in Ioannina (a) and Heraklion (b).

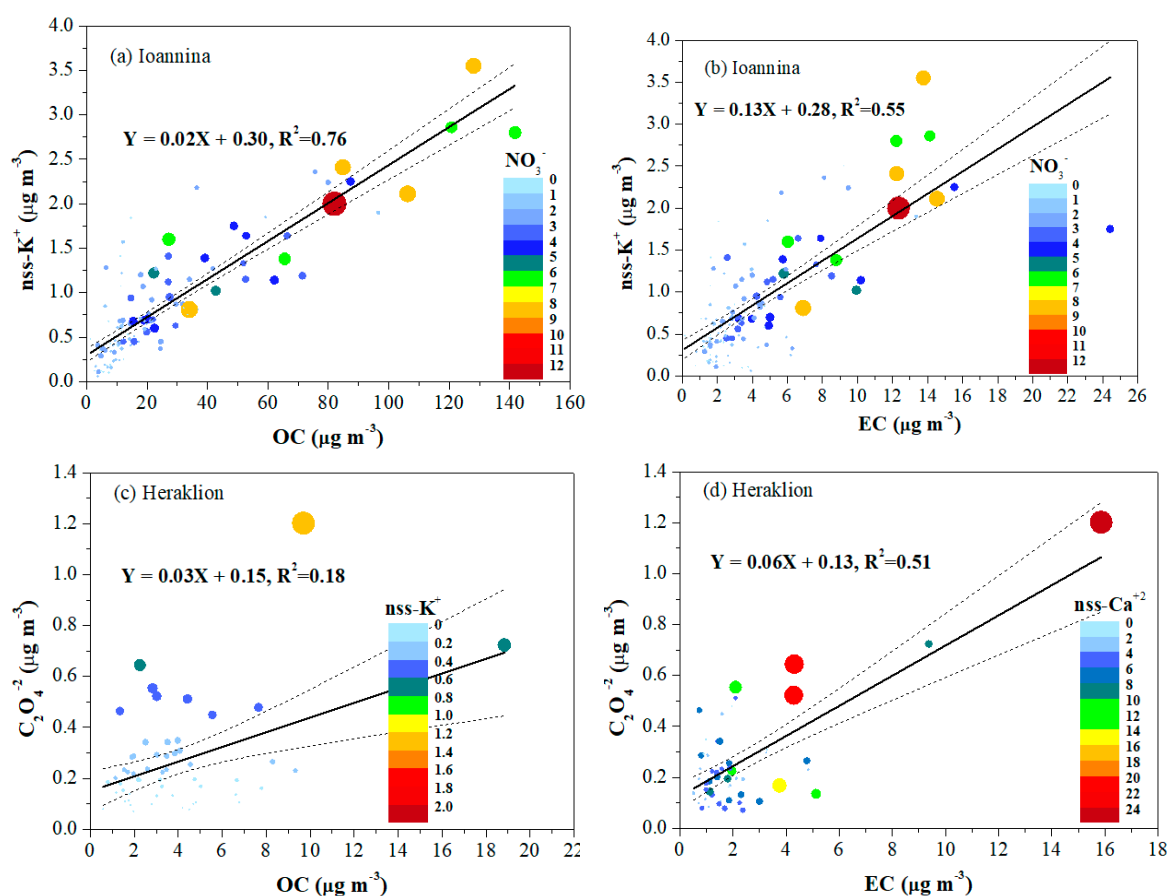

**Figure 4.** Correlations between OC, EC concentrations and nss-K<sup>+</sup>, C<sub>2</sub>O<sub>4</sub><sup>2-</sup> in Ioannina (a,b) and Heraklion (c,d).

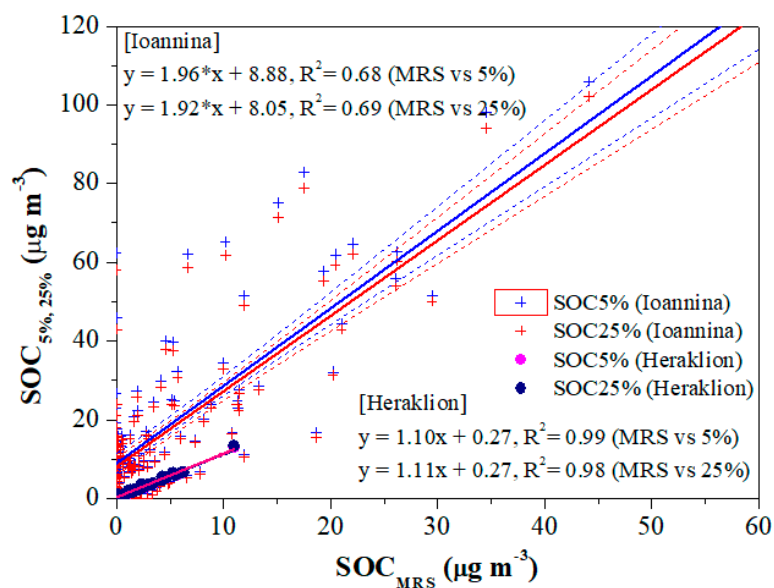

**Figure 5.** Correlations between the estimated SOC concentrations obtained from the MRS and percentile (5%, 25%) methods in Ioannina and Heraklion.

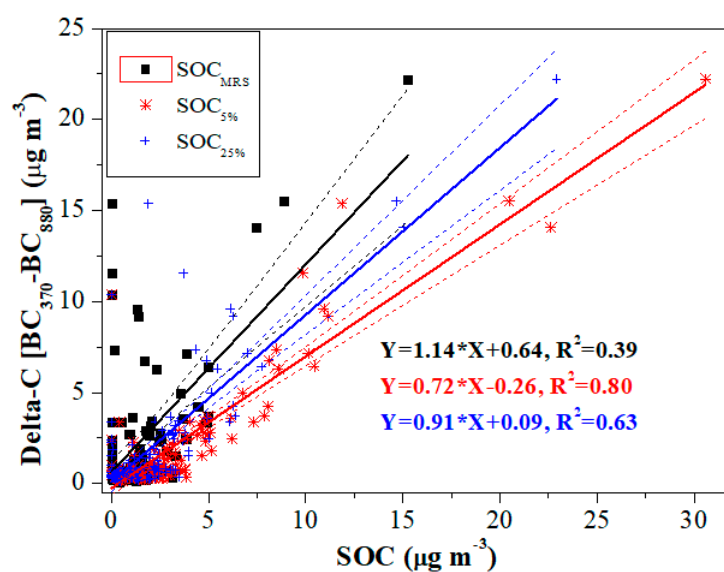

**Figure 6.** Correlation between the SOC estimates from the various SOC estimation methods and the Delta-C values derived from Aethalometer (AE-33) measurements in Athens during December 2016–January 2017..
